# Supplementary material
Source: Springer Nature journal article supplement (https://www.springerprofessional.de/resource/supplementary/13638_2014_947_MOESM10_ESM.pdf/11898840)

VSA/AO: Geometric Mean of Average User Rates Over Time

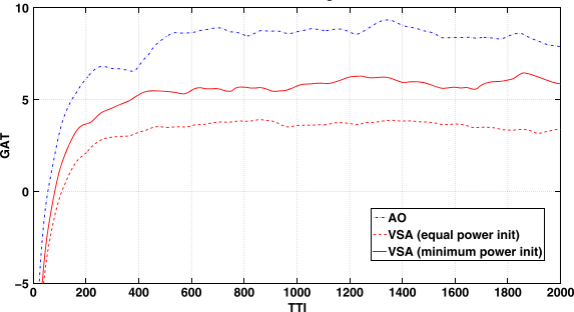

Supplement: MOESM10 [file 11898840]
